# Supplementary material
Source: publisher figshare collection journal article supplement (https://sage.figshare.com/ndownloader/files/13175144)

**Combining satellite and survey data to study Indian slums: evidence on the range of conditions and implications for urban policy**

**Supplementary information**

TABLE S1  
Summary of data collected between 2010 and 2016

| Year | City      | Sample source               | Neighbourhood surveys | Household surveys | Social network census surveys | Leader interviews |
|------|-----------|-----------------------------|-----------------------|-------------------|-------------------------------|-------------------|
| 2010 | Bangalore | KSDB data                   | 14                    | 1,481             | -                             | -                 |
| 2012 | Bangalore | Satellite images            | 18                    | 631               | -                             | -                 |
| 2013 | Bangalore | Satellite images            | 157                   | -                 | -                             | -                 |
| 2015 | Bangalore | 2010, 2012 and 2013 samples | 40                    | 1,272             | -                             | -                 |
| 2016 | Jaipur    | PDCOR and satellite data    | 45                    | 2,718             | 4                             | 91                |
| 2016 | Patna     | SPUR data                   | 43                    | 2,155             | 4                             | 78                |

NOTES:

KSDB refers to Karnataka Slum Development Board.

PDCOR refers to PDCOR Limited, a joint venture between the Government of Rajasthan and Infrastructure Leasing & Financial Services.

SPUR refers to Support Programme for Urban Reforms.

TABLE S2  
Description of regression variables

| Variable                                    | Construction                                                                                                                      | Units                     | Observed range |
|---------------------------------------------|-----------------------------------------------------------------------------------------------------------------------------------|---------------------------|----------------|
| <b><i>Neighbourhood characteristics</i></b> |                                                                                                                                   |                           |                |
| Age of slum                                 | Focus group estimate of slum age                                                                                                  | Years                     | (3, 250)       |
| Neighbourhood size                          | Focus group estimate of number of households                                                                                      | Households                | (20, 4018)     |
| Other services                              | Principal component score of indicators for road quality and garbage disposal services, which were not included in the slum score | Principal component score | (-2.3, 1.2)    |
| <b><i>Household characteristics</i></b>     |                                                                                                                                   |                           |                |
| Proportion General Caste                    | Proportion of respondents indicating they are General Caste                                                                       | Percentage                | (0, .5)        |
| Proportion                                  | Proportion of respondents indicating they are either Scheduled                                                                    | Percentage                | (0, 1)         |

|                                               |                                                                                                                                                                                                                                                                                                            |                                    |                       |
|-----------------------------------------------|------------------------------------------------------------------------------------------------------------------------------------------------------------------------------------------------------------------------------------------------------------------------------------------------------------|------------------------------------|-----------------------|
| Scheduled Caste/Scheduled Tribe               | Caste or Scheduled Tribe                                                                                                                                                                                                                                                                                   |                                    |                       |
| Proportion Muslim                             | Proportion of respondents indicating they are Muslim                                                                                                                                                                                                                                                       | Percentage                         | (0, 1)                |
| <b>Variable</b>                               | <b>Construction</b>                                                                                                                                                                                                                                                                                        | <b>Units</b>                       | <b>Observed range</b> |
| Proportion migrant                            | Proportion of respondents indicating they migrated to the city during their lifetime                                                                                                                                                                                                                       | Percentage                         | (0, .8)               |
| Average years lived in slum                   | Average number of years respondents have lived in their current home (within the slum)                                                                                                                                                                                                                     | Years                              | (3.6, 34.5)           |
| Spending on travel to rural village           | Average expenditure on travel back to rural areas as a percentage of total expenditure                                                                                                                                                                                                                     | Percentage                         | (0, .4)               |
| Education level                               | Education was measured differently across waves. Respondents recorded either the number of years in school or the highest academic milestone achieved. For standardization across waves, responses are scaled from 0 to 1.                                                                                 | Scale from least to most education | (0, 1)                |
| Proportion manual labour                      | Proportion of respondents employed in construction, factory, sanitation, or other manual work                                                                                                                                                                                                              | Percentage                         | (0, .93)              |
| Economic mobility                             | Average change in stages of progress as described by Krishna. <sup>(a)</sup> This method asks the respondents the highest level of 10 needs they can afford now and could afford 10 years ago.                                                                                                             | Levels afforded                    | (-.5, 4.2)            |
| <b><i>Tenure security</i></b>                 |                                                                                                                                                                                                                                                                                                            |                                    |                       |
| Perceived recognition                         | Proportion of respondents who respond that the government has assigned “notified” status to the slum                                                                                                                                                                                                       | Percentage                         | (0, 1)                |
| Proportion with house and land titles         | Proportion of respondents possessing titles for their home and land                                                                                                                                                                                                                                        | Percentage                         | (0, .9)               |
| Proportion with ration cards                  | Proportion of respondents possessing a ration card                                                                                                                                                                                                                                                         | Percentage                         | (0, .98)              |
| <b><i>Slum leadership</i></b>                 |                                                                                                                                                                                                                                                                                                            |                                    |                       |
| Proportion reporting presence of local leader | Proportion of respondents indicating there is a local leader residing in the slum                                                                                                                                                                                                                          | Percentage                         | (0, .98)              |
| <b><i>City-level controls</i></b>             |                                                                                                                                                                                                                                                                                                            |                                    |                       |
| Patna                                         | Statistical diagnosis revealed that including indicator variables for Bangalore and Jaipur could bias the results due to the strong correlation between scores in these cities. We instead add an indicator variable equal to 1 for slums located in Patna and 0 for slums located in Bangalore or Jaipur. | Yes or no                          | (0, 1)                |

NOTE:

<sup>(a)</sup> Krishna, Anirudh (2010), “Who became poor, who escaped poverty, and why? Developing and using a retrospective methodology in five countries”, *Journal of Policy Analysis and Management* Vol 29, No 2, pages 351–372.

FIGURE S1  
Distribution of scores by city

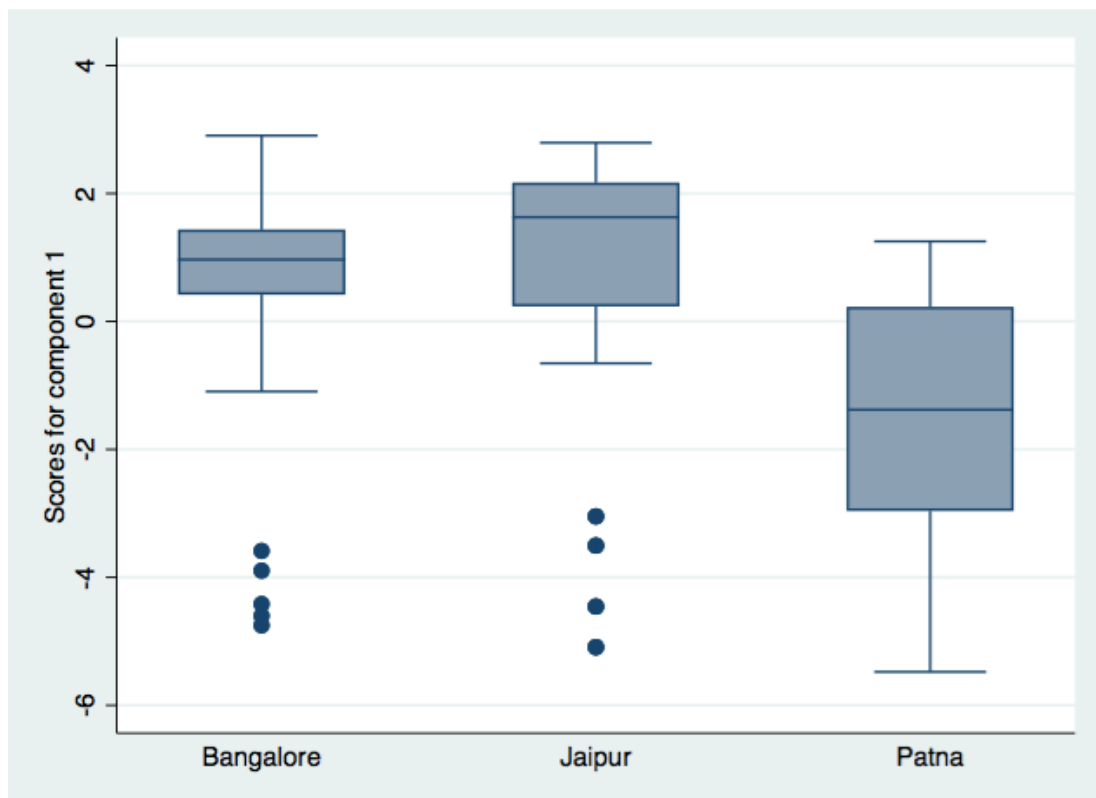

FIGURE S2  
Predicted continuum score across a range of education and service access values

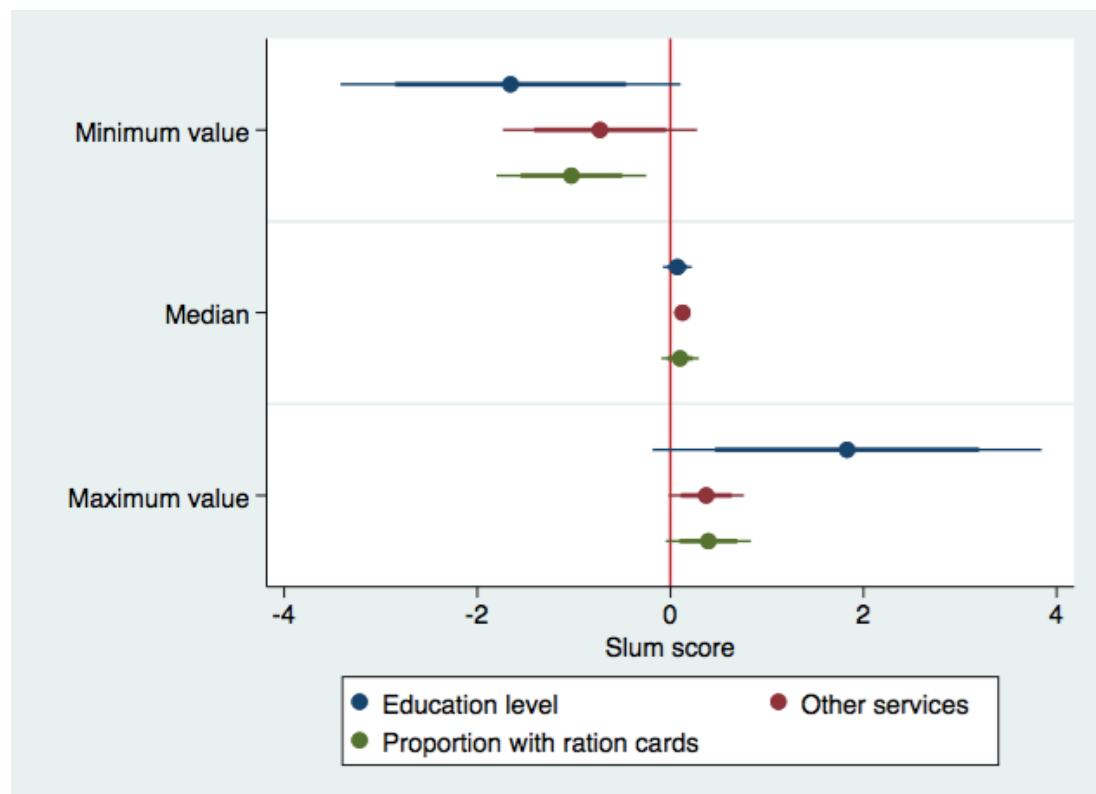

Supplement: Supplementary file 1 [file 13175144]
